# Supplementary material
Source: PubMed Central journal article supplement (PMC5000057)

## Supplementary Information

### Insights into Brain Glycogen Metabolism: The Structure of Human Brain Glycogen Phosphorylase

Cécile Mathieu<sup>1</sup>, Ines Li de la Sierra-Gallay<sup>2</sup>, Romain Duval<sup>1</sup>, Ximing Xu<sup>1,#</sup>, Angélique Cocaign<sup>1</sup>, Thibault Léger<sup>3</sup>, Gary Woffendin<sup>4</sup>, Jean-Michel Camadro<sup>3</sup>, Catherine Etchebest<sup>5,6</sup>, Ahmed Haouz<sup>7</sup>, Jean-Marie Dupret<sup>1,6</sup> and Fernando Rodrigues-Lima<sup>1,6,\*</sup>

<sup>1</sup>Université Paris Diderot, Sorbonne Paris Cité, Unité BFA, CNRS UMR 8251, 75013 Paris, France

<sup>2</sup>Fonction et Architecture des Assemblages Macromoléculaires, Institut de Biologie Intégrative de la Cellule, Université Paris Sud, UMR 9198 Orsay, F91405 France

<sup>3</sup>Université Paris Diderot, Sorbonne Paris Cité, Institut Jacques Monod, CNRS UMR 7592, 75013 Paris, France

<sup>4</sup>Thermo Fisher Scientific, Hemel Hempstead, United Kingdom

<sup>5</sup>INSERM, UMR S1134, Université Paris Diderot, F-75015 Paris, France; Université Paris Diderot, Sorbonne Paris Cité, Paris France; Institut National de la Transfusion Sanguine (INTS), Paris, France; GR-Ex, Laboratoire d'excellence, Paris France

<sup>6</sup>UFR Sciences du Vivant, Université Paris Diderot, 75013 Paris, France

<sup>7</sup>Institut Pasteur, Plateforme de Cristallographie, CNRS UMR 3528, 75015 Paris, France

<sup>#</sup>present address: Institut Pasteur, Unité de Pathogénèse des Infections Vasculaires, 75015 Paris, France

Running title: Structure of human brain glycogen phosphorylase

\* To whom correspondence should be address: Fernando Rodrigues-Lima  
email: [fernando.rodriques-lima@univ-paris-diderot.fr](mailto:fernando.rodriques-lima@univ-paris-diderot.fr)

**Keywords:** brain metabolism, energy metabolism, crystal structure, allosteric regulation, brain functions, Lafora disease

**SUPPLEMENTARY FIGURE 1. Expression and purification of recombinant bGP.**

Native mass spectrometry analysis of bGP. Phosphorylated bGP (10  $\mu$ M) and non-phosphorylated bGP (10  $\mu$ M) were subjected to native mass spectrometry. The main signal corresponded to the dimeric form of bGP containing the PLP cofactor. The phosphorylated dimer had an additional mass of about 159 Da, corresponding to the additional mass of two phosphate groups per dimer.

**SUPPLEMENTARY FIGURE 2. Electron density of PEG 400 and AMP in the AMP binding site.**

Electron density corresponding to the PEG 400 molecule (upper panel) and the allosteric effector AMP (lower panel) were observed in the AMP-binding site of bGP.

### Supplementary Table 1: Dynamic light scattering (DLS) data

Dynamic light scattering measurements were performed with a DynaPro-MS800 molecular-sizing instrument (Protein solutions, Lakewood, NJ, USA). Protein samples at 3,2mg/ml in 20 mMTris-HCl pH7,0 in the presence or in absence of 5mM AMP were loaded into a 45µl quartz cuvette. The hydrodynamic radius and molecular mass were determined from 50 measurements at 18°C. Data were analyzed using DYNAMICS 6.9.2.11 software. The results are summarized in the table and figures bellow and show that the recombinant bGP protein in the presence or in the absence of are in equilibrium between **monomeric (98 kDa) and dimeric (196 kDa)** form in solution and the presence of AMP does not induce the tetramerization of the protein.

| Protein   | Hydrodynamic radius(nm) | Apparent Molecular weight estimated by DLS (kDa) | Theoretical molecular weight of monomer (kDa) |
|-----------|-------------------------|--------------------------------------------------|-----------------------------------------------|
| bGP       | 4,8                     | 131                                              | 98                                            |
| bGP + AMP | 5,6                     | 188                                              | 196                                           |

#### DSL in the absence of AMP:

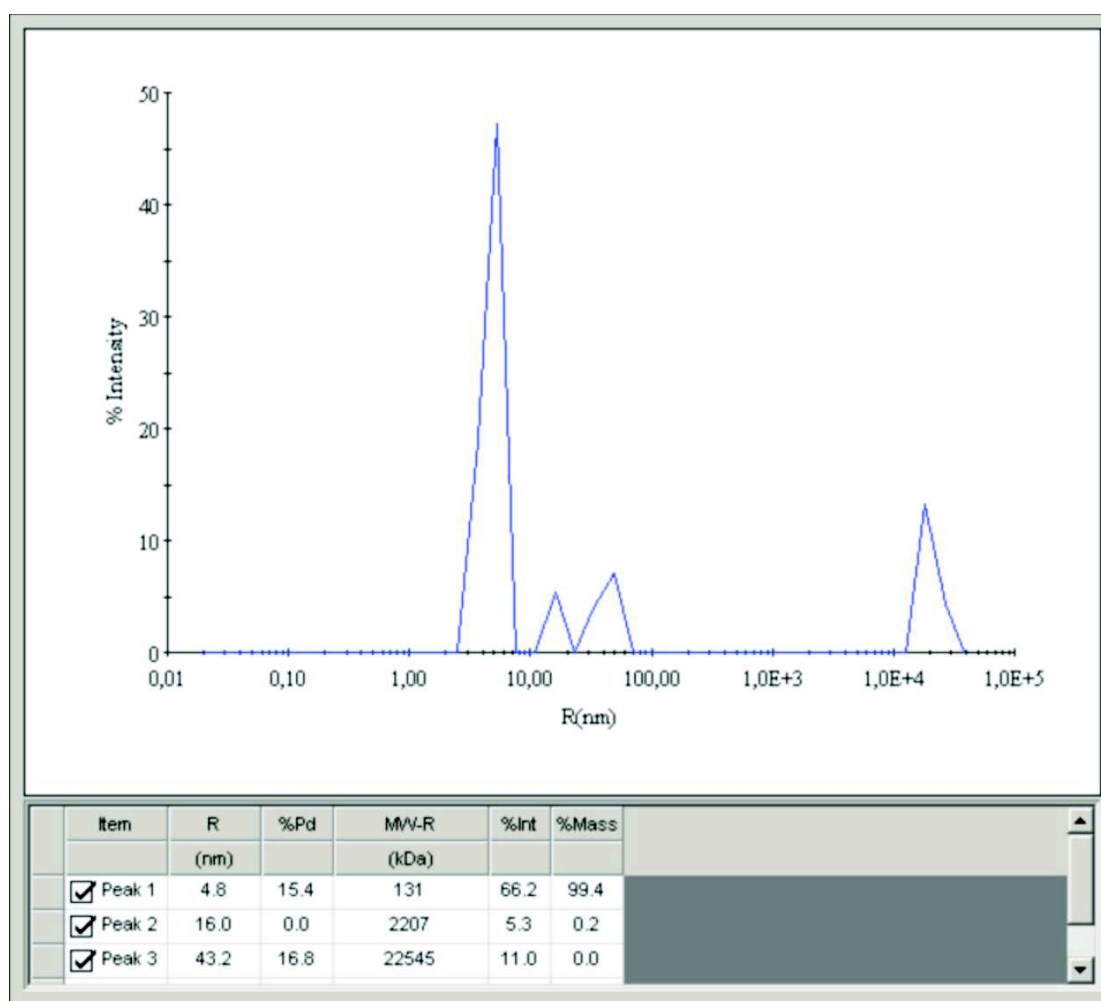

*DLS in the presence of AMP*

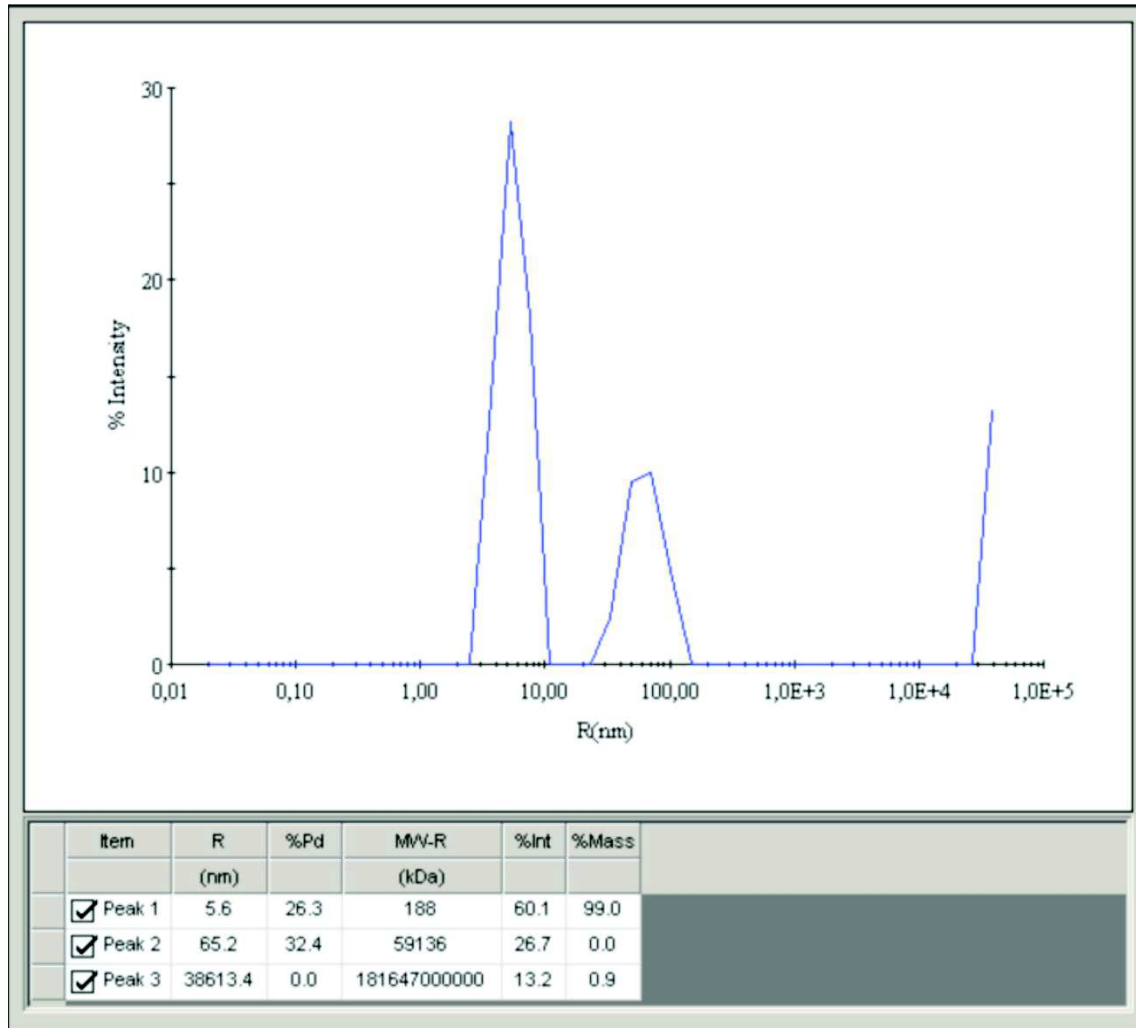

**R:** Hydrodynamic radius; **%Pd:** % of polydispersity

**MW-R:** apparent molecularweight

**% Int :** % of lighthscattered by thismolecularspecies

**%Mass:** is % in terms of population of thismolecularspecies

# Supplementary figure 1

## Non phosphorylated bGP

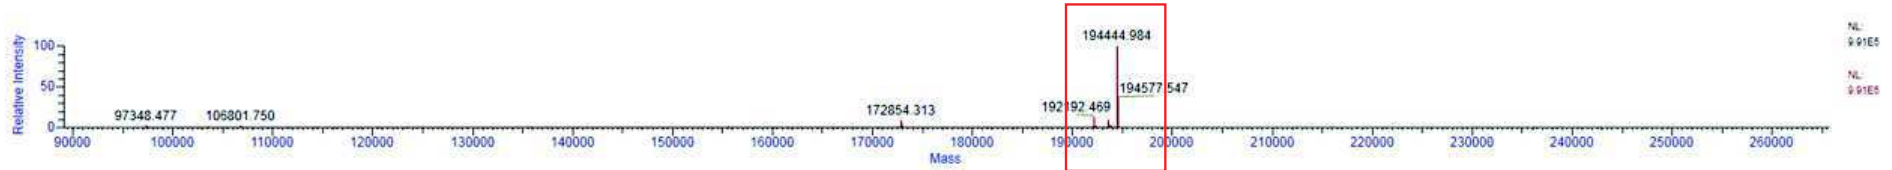

| No. | Average Mass | Intensity  | Number of Charge States | Mass Std Dev | PPM Std Dev | Delta Mass | Relative Abundance | Fractional Abundance | RT Range    | Apex RT | Score   |
|-----|--------------|------------|-------------------------|--------------|-------------|------------|--------------------|----------------------|-------------|---------|---------|
| 1   | 194444.984   | 991,124.62 | 9                       | 1.29         | 6.63        | 0.00       | 100.0000           | 55.7571              | 1.926-2.445 | 0.8579  | 37.3887 |
| 2   | 172854.313   | 85,983.53  | 4                       | 14.87        | 86.06       | -21,590.67 | 8.6754             | 4.8371               | 1.926-2.445 | 1.206   | 3.3760  |
| 3   | 194577.547   | 360,338.69 | 7                       | 0.88         | 4.53        | 132.56     | 36.3565            | 20.2714              | 1.926-2.445 | 1.223   | 26.8028 |
| 4   | 193620.359   | 93,514.44  | 7                       | 1.53         | 7.91        | -824.62    | 9.4352             | 5.2608               | 1.926-2.445 | 1.243   | 21.2400 |
| 5   | 192192.469   | 127,770.22 | 7                       | 1.19         | 6.21        | -2,252.52  | 12.8914            | 7.1879               | 1.926-2.445 | 4.654   | 21.1542 |
| 6   | 172974.188   | 23,461.55  | 4                       | 15.50        | 89.60       | -21,470.80 | 2.3672             | 1.3199               | 1.926-2.445 | 1.296   | 6.2634  |

## Phosphorylated bGP

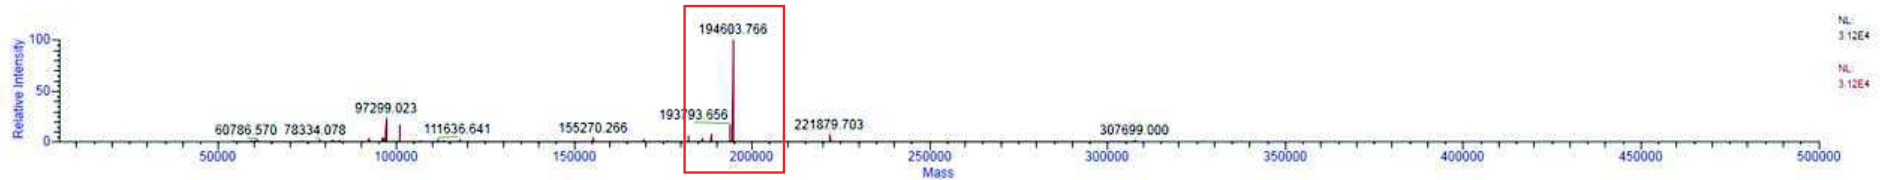

| No. | Average Mass | Intensity | Number of Charge States | Mass Std Dev | PPM Std Dev | Delta Mass | Relative Abundance | Fractional Abundance | RT Range    | Apex RT | Score   |
|-----|--------------|-----------|-------------------------|--------------|-------------|------------|--------------------|----------------------|-------------|---------|---------|
| 1   | 194603.766   | 31,163.88 | 9                       | 15.57        | 80.02       | 0.00       | 100.0000           | 42.5609              | 18.62-18.62 | 0       | 41.3977 |
| 2   | 100896.625   | 5,274.53  | 3                       | 3.35         | 33.23       | -93,707.14 | 16.9251            | 7.2035               | 18.62-18.62 | 16.62   | 15.7866 |
| 3   | 97299.023    | 7,123.86  | 3                       | 5.40         | 55.46       | -97,304.74 | 22.8594            | 9.7292               | 18.62-18.62 | 0       | 15.0293 |
| 4   | 193793.656   | 5,274.49  | 5                       | 10.08        | 52.01       | -810.11    | 16.9250            | 7.2034               | 18.62-18.62 | 18.31   | 23.9591 |
| 5   | 97067.898    | 4,106.95  | 4                       | 2.94         | 30.32       | -97,535.87 | 13.1786            | 5.6089               | 18.62-18.62 | 0       | 19.7956 |
| 6   | 307699.000   | 501.38    | 7                       | 66.92        | 217.51      | 113,095.23 | 1.6089             | 0.6847               | 18.62-18.62 | 0       | 28.0075 |

Supplementary Figure 2

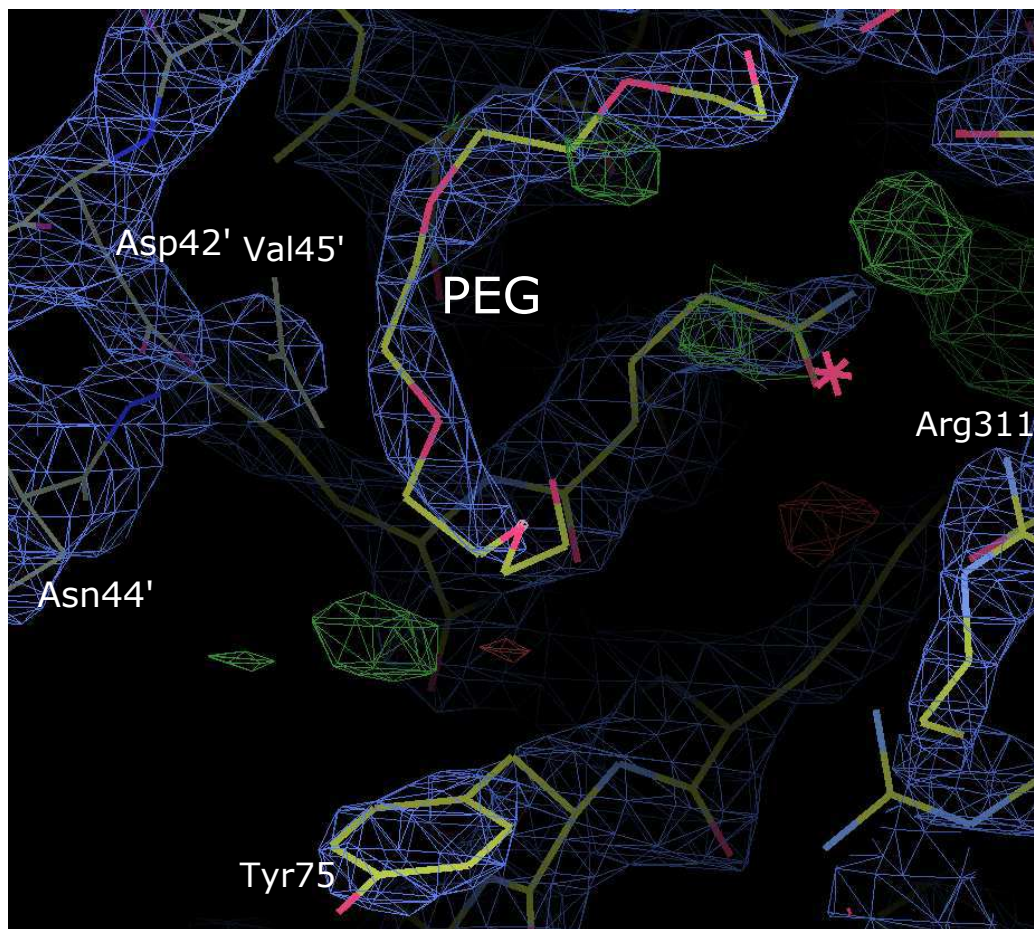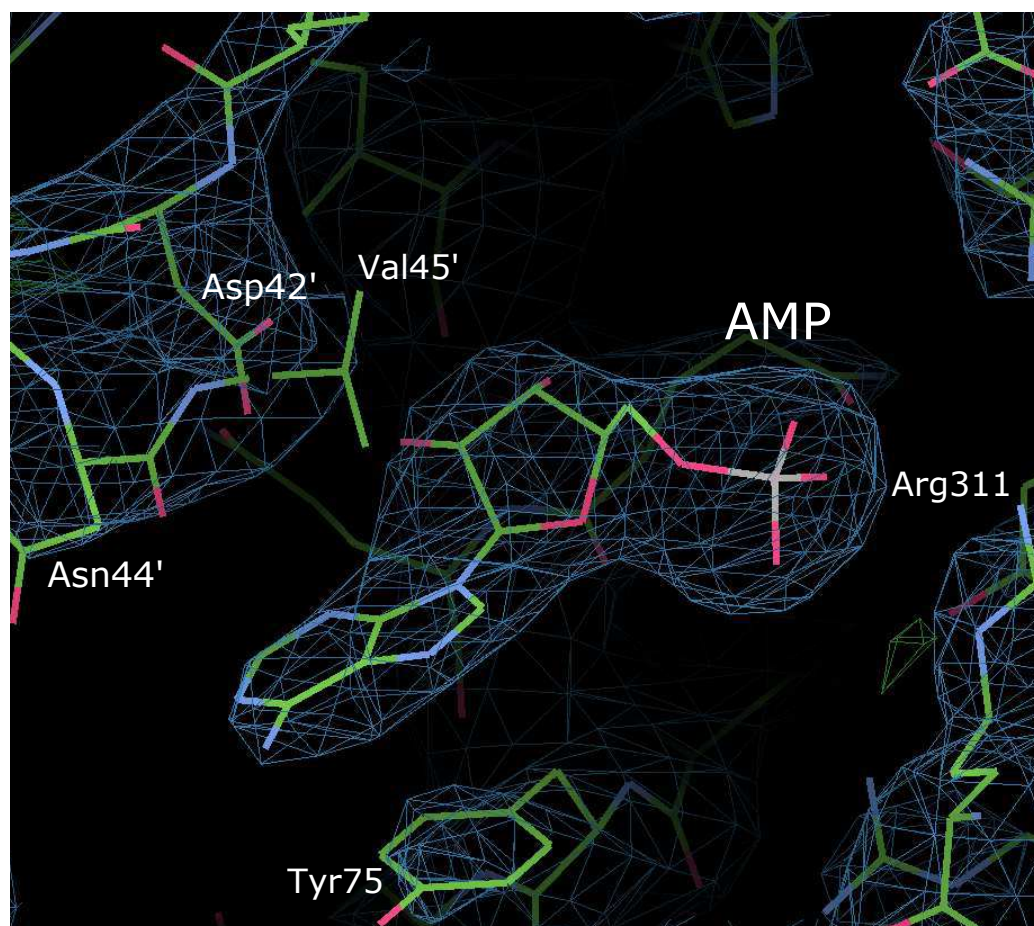

Supplement: 10.1074_M116.738898_jbc.M116.738898-1.pdf [file 10.1074_M116.738898_jbc.M116.738898-1.pdf]
